# Supplementary material for: Crystal-to-crystal transformation amongst dimorphs of racemic 2,6-di-O-(p-halo benzoyl)-myo-inositol 1,3,5-orthoformates that achieves halogen bonding contacts
Source: Royal Society of Chemistry journal article supplement (doi:10.1039/b712528c), 2007-10-19
Supplement: b712528c.pdf [file b712528c.pdf]

## **Crystal-to-Crystal Phase Transformation that Achieves Halogen Bonding: Structures of Dimorphs of Racemic 2,4-di-*O*- (*p*-halo benzoyl)-*myo*-inositol 1,3,5-orthoformates**

Rajesh G. Gonnade,<sup>a</sup> Mohan M. Bhadbhade,<sup>a,\*</sup> and Mysore S. Shashidhar<sup>b,\*</sup>

<sup>a</sup> *Center for Materials Characterization, <sup>b</sup> Division of Organic Chemistry (Synthesis), National Chemical Laboratory, Dr. Homi Bhabha Road, Pashan, Pune 411 008, INDIA*  
E-mail: mm.bhadbhade@ncl.res.in, ms.shashidhar@ncl.res.in

### **The supporting Information consist of**

**Figure S1:** DSC profiles of A) Form I crystals and B) Form II crystals of **2**.

**Figure S2:** ORTEP Form II crystals of **2** and overlap of Form I and Form II crystals of **2**.

**Figure S3:** Figure showing isostructural molecular string and bilayers for dimorphs of **2**.

**Figure S4:** Bridging of bilayers in dimorphs of **2**.

**Figure S5:** Association of dimers in dimorphs of **2**.

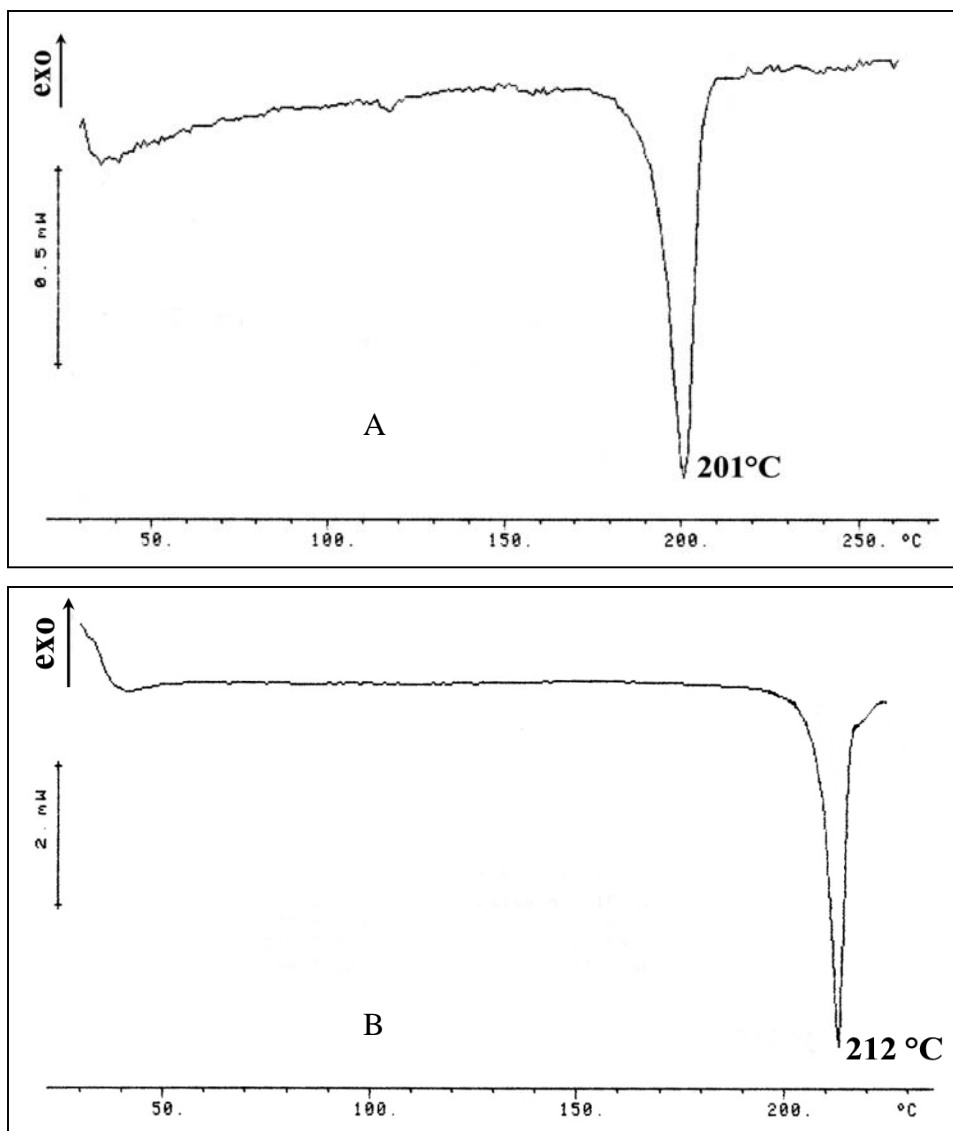

**Figure S1:** DSC profiles of A) Form I crystals and B) Form II crystals of **2**.

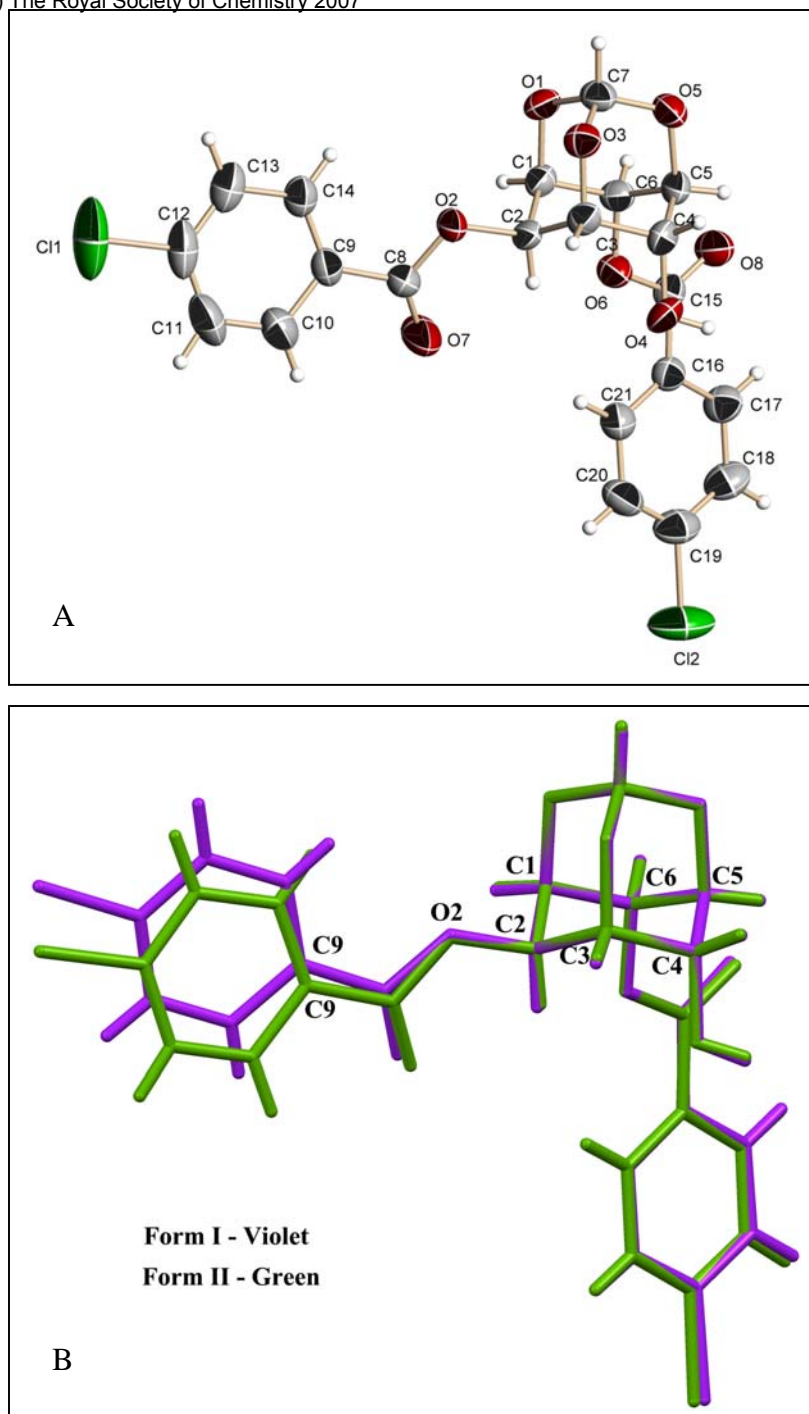

**Figure S2:** A) ORTEP view Form II crystals of **2** and B) overlap of Form I and Form II crystals of **2**.

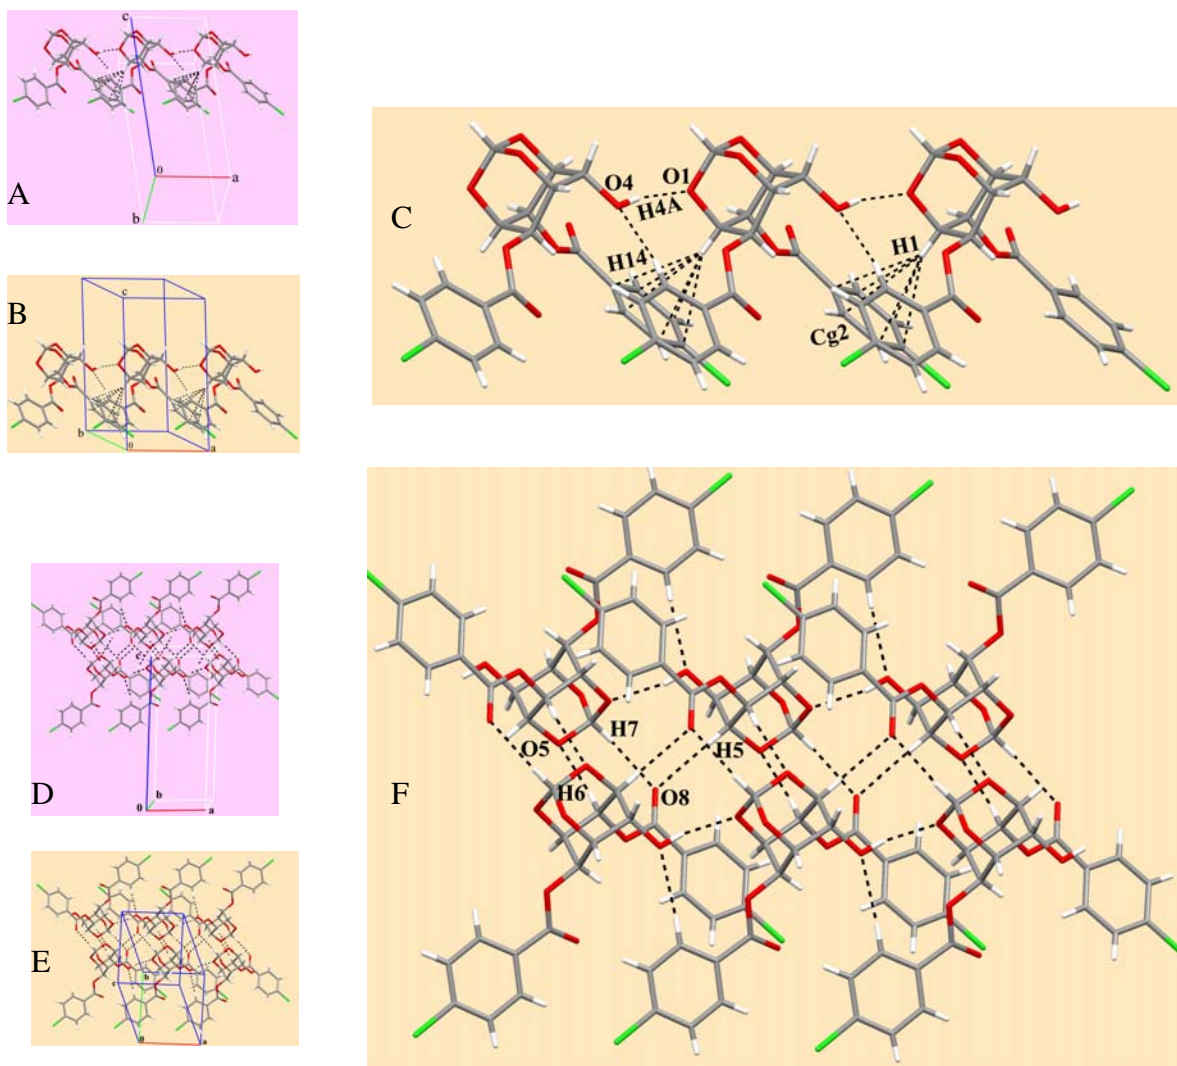

**Figure S3:** View of identical molecular string linked via O4-H4A...O1, C14-H14...O4 and C1-H1... $\pi$  (Cg2) contacts showing one-dimensional isostructurality in dimorphs of **2** along a-axis, A) in Form I, B) in Form II and C) a closer view of these interactions in Form II; View of bilayer formed via centrosymmetric C-H...O bridging of these strings along the same axis in crystals of **2**, D) Form I, E) Form II and F) closer view of these interactions in Form II.

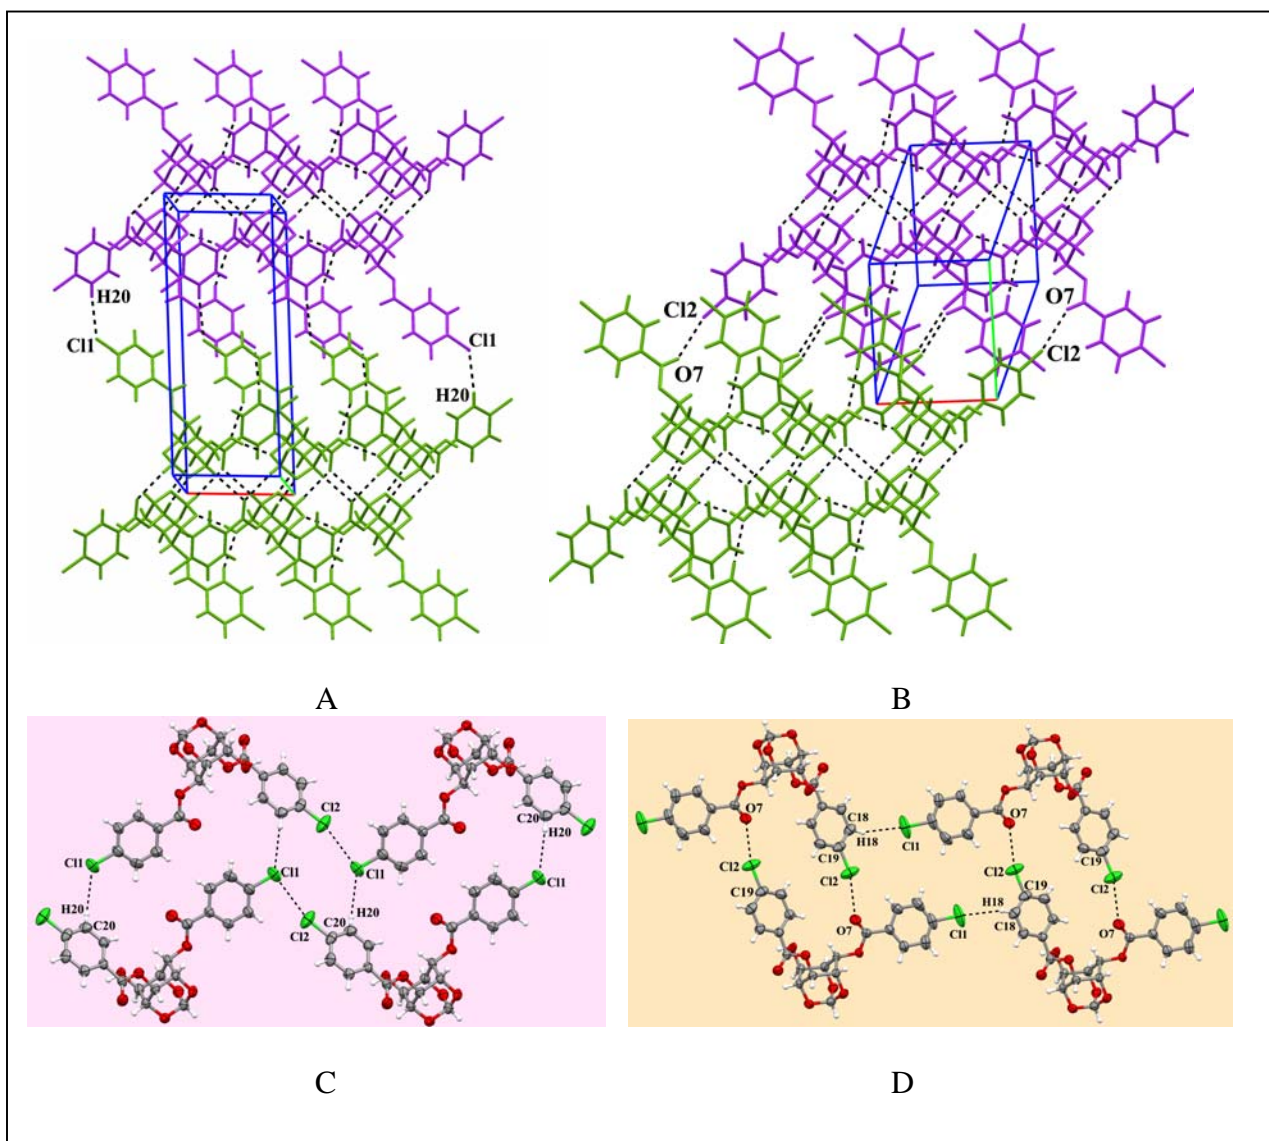

**Figure S4.** Different adhesions of bilayers in dimorphs of **2**; A) via C-H...Cl contact in Form I and B) through C-Cl...O (halogen bonding) contact in Form II; ORTEP views (C) and (D) shows the interfacing of bilayers in Form I and Form II crystals respectively.

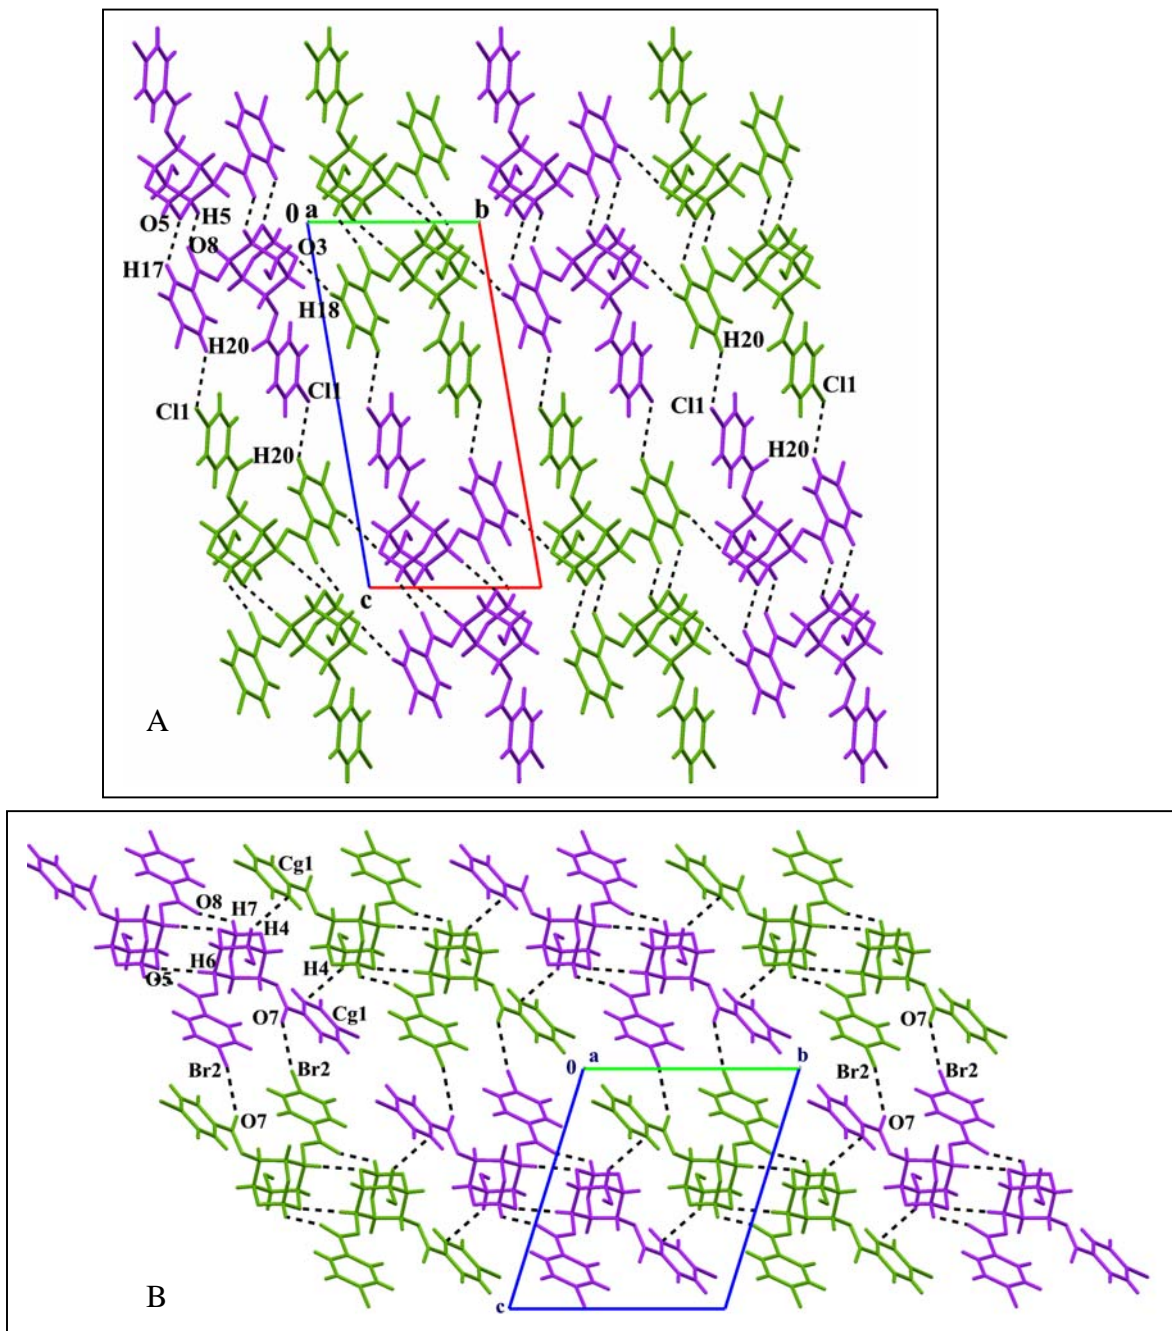

**Figure S5.** Difference in the organization of (isostructural) bilayers viewed down a-axis in dimorphs of **2**, A) Form I and B) Form II crystals.
